# Supplementary material for: N2 adsorption on high-entropy alloy surfaces: unveiling the role of local environments
Source: Royal Society of Chemistry journal article supplement (doi:10.1039/d2ta09348k), 2023-01-01
Supplement: d2ta09348k1.pdf [file d2ta09348k1.pdf]

## Supplementary information

### N<sub>2</sub> Adsorption on High-Entropy Alloy Surfaces: Unveiling the Role of Local Environments

Rafael B. Araujo<sup>a,\*</sup> and Tomas Edvinsson<sup>a,\*</sup>

<sup>a</sup> *Department of Materials Science and Engineering, The Ångström Laboratory, Uppsala University,  
P.O. Box 35, SE-751 03 Uppsala, Sweden*

Table S1: Lattice constate values used to weight-average to assess the HEA lattice constants.

|    | Lattice Constant (Å) |
|----|----------------------|
| Mo | 3.99                 |
| Cr | 3.61                 |
| Mn | 3.50                 |
| Fe | 3.65                 |
| Co | 3.53                 |
| Ni | 3.54                 |
| Cu | 3.66                 |
| Zn | 3.97                 |

Table S2: Average N<sub>2</sub> adsorption energies, average *d* BCs, average Bader Charges

| Elements | Average N <sub>2</sub> Adsorption Energy (eV) | Averaged <i>d</i> BC for the surface atoms. | Averaged Bader charge |
|----------|-----------------------------------------------|---------------------------------------------|-----------------------|
| Mo       | -0.58                                         | -0.10                                       | 0.20                  |
| Cr       | -0.49                                         | 0.06                                        | 0.26                  |
| Mn       | -0.23                                         | -0.18                                       | 0.30                  |
| Fe       | -0.35                                         | -0.79                                       | 0.05                  |
| Co       | -0.43                                         | -0.95                                       | -0.16                 |
| Ni       | -0.22                                         | -1.19                                       | -0.25                 |
| Cu       | 0.11                                          | -2.43                                       | -0.16                 |

Table S3: Correlation coefficients and mean Absolut errors (MAEs) between the linear model presented in section “**d BCs of the adsorbing element and the Bader charge of the adsorbing element vs. the composition of the first solvation shell:**” and the DFT data. Correlation coefficients are presented in Figure 9 of the manuscript.

| Elements | Correlation coefficient | MAE of adds. Model vs. DFT | <i>d</i> BC correlation coefficient | MAE <i>d</i> BC of Model vs. DFT | Bader charge correlation coefficient | MAE Bader charge Model vs. DFT | Correlation coefficient of <i>d</i> BC vs. Badder |
|----------|-------------------------|----------------------------|-------------------------------------|----------------------------------|--------------------------------------|--------------------------------|---------------------------------------------------|
| Mo       | 0.62                    | 0.07                       | 0.54                                | 0.1                              | 0.96                                 | 0.02                           | 0.035                                             |
| Cr       | 0.66                    | 0.11                       | 0.78                                | 0.2                              | 0.95                                 | 0.03                           | 0.638                                             |
| Mn       | 0.05                    | 0.23                       | 0.51                                | 0.3                              | 0.8                                  | 0.06                           | 0.583                                             |
| Fe       | 0.57                    | 0.1                        | 0.68                                | 0.06                             | 0.98                                 | 0.02                           | -0.21                                             |
| Co       | 0.55                    | 0.07                       | 0.44                                | 0.05                             | 0.99                                 | 0.02                           | -0.261                                            |
| Ni       | 0.77                    | 0.07                       | 0.92                                | 0.04                             | 0.99                                 | 0.01                           | 0.732                                             |
| Cu       | 0.6                     | 0.04                       | 0.91                                | 0.05                             | 0.97                                 | 0.02                           | 0.826                                             |

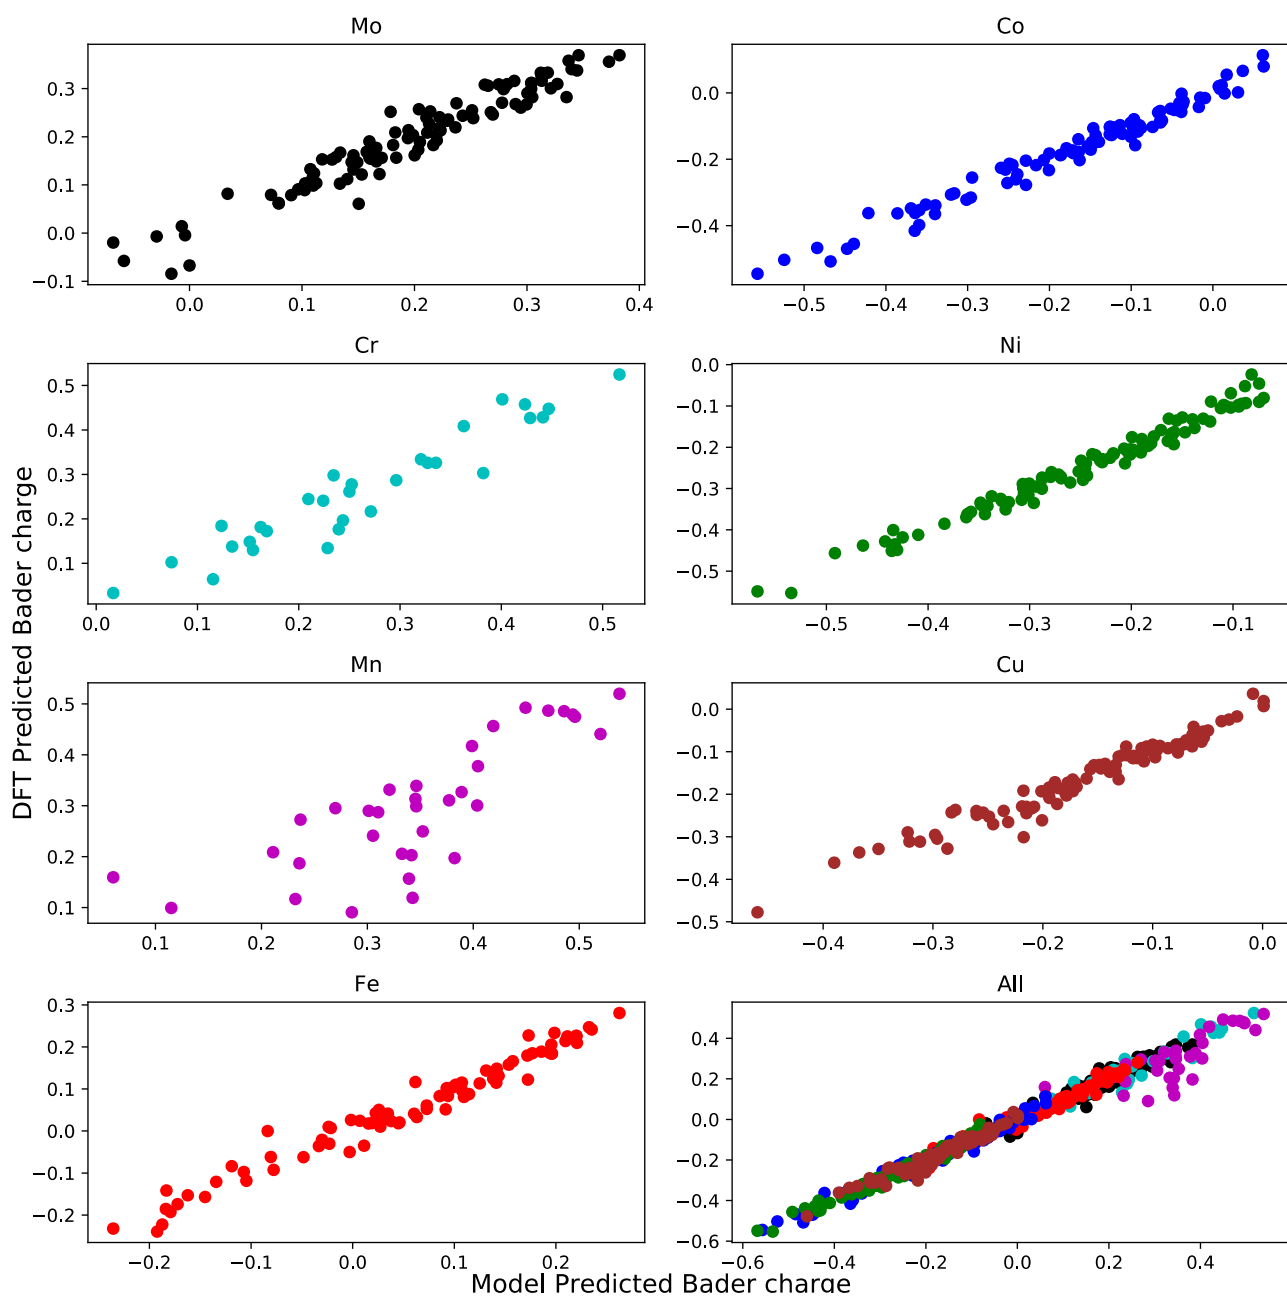

Figure S1: Multilinear models to predict Bader charges based on the number of elements in the first solvation shell of the adsorbing element. Here,  $N_2$  adsorbing on Mo, Cr, Mn, Fe, Ni and Cu elements are plotted with distinct colors and also plotted all together.

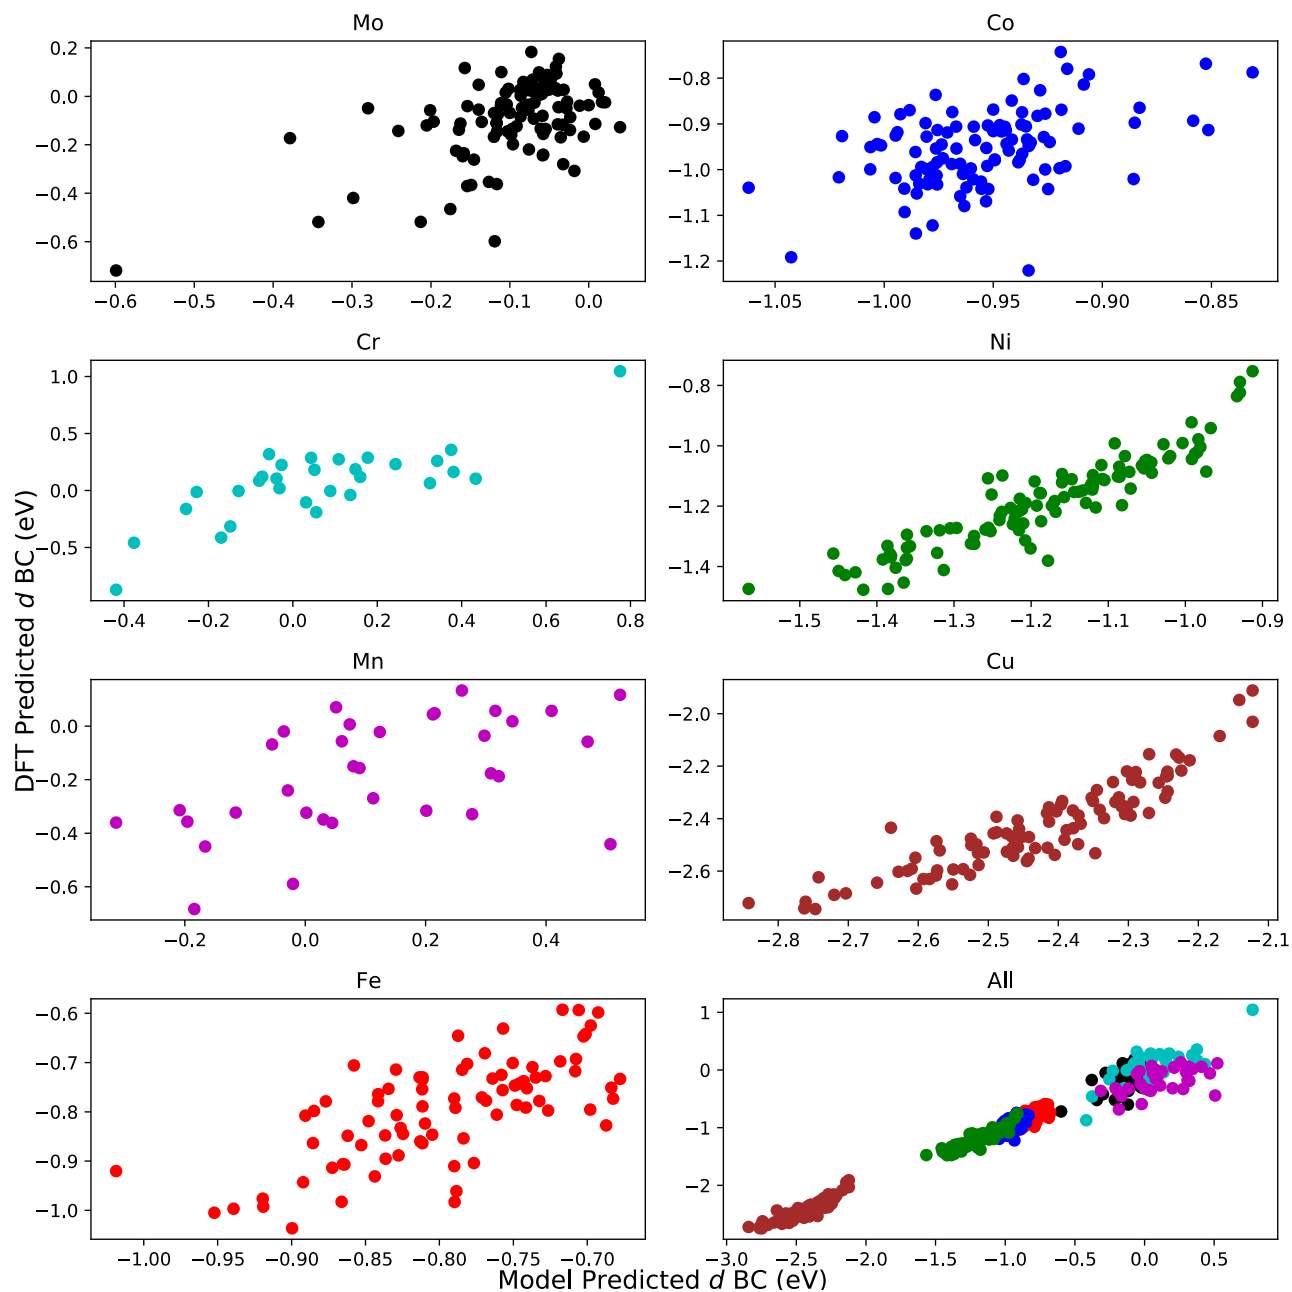

Figure S2: Multilinear models to predict  $d$  BCs based on the number of elements in the first solvation shell of the adsorbing element. Here,  $N_2$  adsorbing on Mo, Cr, Mn, Fe, Ni and Cu elements are plotted with distinct colors and also plotted all together.

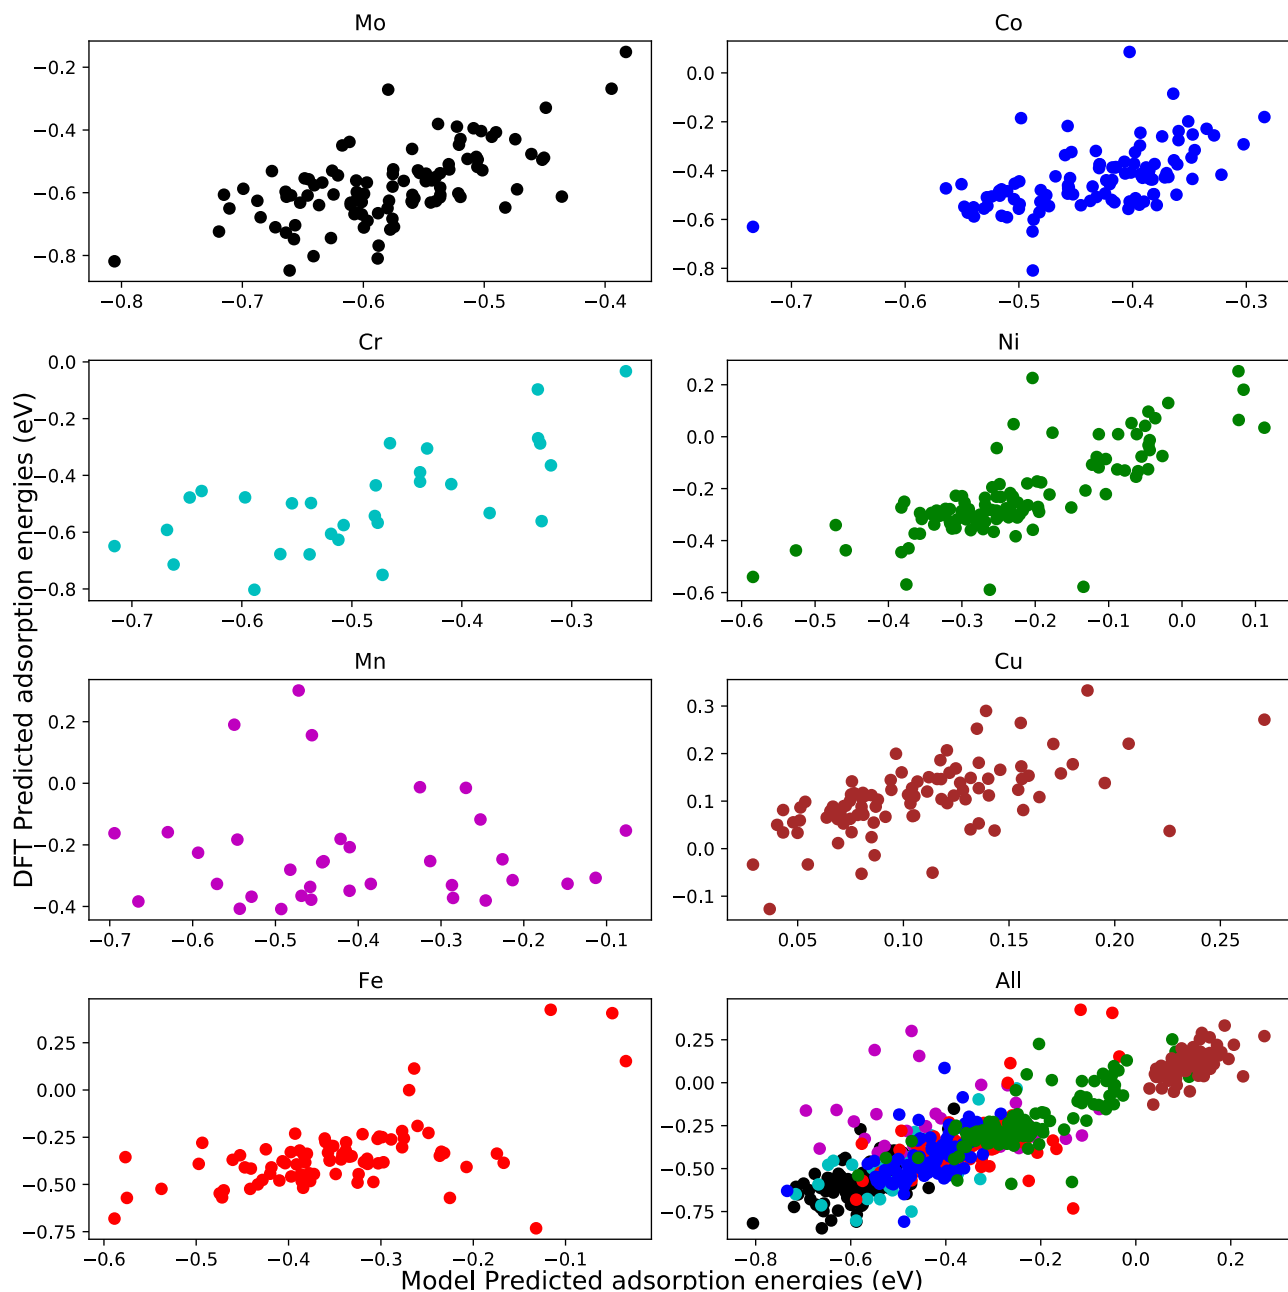

Figure S3: Multilinear models to predict DFT adsorption energies based on the number of elements in the first solvation shell of the adsorbing element. Here,  $N_2$  adsorbing on Mo, Cr, Mn, Fe, Ni and Cu elements are plotted with distinct colors and also plotted all together.
